# Supplementary material for: Escape from the interferon response associated with RNA interference using vectors that encode long modified hairpin-RNA
Source: Royal Society of Chemistry journal article supplement (doi:10.1039/b510159j), 2005-11-07
Supplement: b510159j.pdf [file b510159j.pdf]

**Supplementary Table 1.** Sequences downstream of the U6 or tRNA promoter. Sense mutations are indicated in lower cases.

|         |                                                                                                                                                                                                                                                                                                                      |
|---------|----------------------------------------------------------------------------------------------------------------------------------------------------------------------------------------------------------------------------------------------------------------------------------------------------------------------|
| mh21    | 5'-GTG CGt TGt TGG TGt tAA tCC TTC AAG AGA GGG TTG GCA CCA<br>GCA GCG CAC TTT TT-3'                                                                                                                                                                                                                                  |
| mh21-2  | 5'-GCC TTt AGG ATT AtA AGg TTC TTC AAG AGA GAA TCT TGT<br>AAT CCT GAA GGC TTT TT-3'                                                                                                                                                                                                                                  |
| mh50    | 5'-GCC TTt AGG ATT AtA AGg TTC AAA GTG tGC TGt TGG TGt CAA<br>CtC TAT TCT TCA AGA GAG AAT AGG GTT GGC ACC AGC AGC<br>GCA CTT TGA ATC TTG TAA TCC TGA AGG CTT TTT-3'                                                                                                                                                  |
| mh50-2  | 5'-GAT TTC GgG TtG TCT TgA TGT ATg GgT TTG gAG AgG AGt TGT<br>TTC TGg GGT TCA AGA GAC CTC AGA AAC AGC TCT TCT TCA AAT<br>CTA TAC ATT AAG ACG ACT CGA AAT CTT TTT-3'                                                                                                                                                  |
| mh100   | 5'-GAT TTC GgG TtG TCT TgA TGT ATg GgT TTG gAG AgG AGt TGT<br>TTC TGg GGA GtC TTt AGG ATT AtA AGg TTC AAA GTG tGC TGt<br>TGG TGt CAA CtC TAT TCT TCA AGA GAG AAT AGG GTT GGC ACC<br>AGC AGC GCA CTT TGA ATC TTG TAA TCC TGA AGG CTC CTC<br>AGA AAC AGC TCT TCT TCA AAT CTA TAC ATT AAG ACG ACT<br>CGA AAT CTT TTT-3' |
| sh21c-A | 5'-GAA TCC CGG CTG CGT CCC AGT TAT ACA AGA GAC TGG GAC<br>GCA GCC GGG ATT TTT-3'                                                                                                                                                                                                                                     |
| sh21c-B | 5'-GCT GCG TCC CAG TTG GAC TTA TTC AAG AGA TAA GTC CAA<br>CTG GGA CGC AGC TTT TT-3'                                                                                                                                                                                                                                  |
| mh51    | 5'-AgG Att AAG CTt AAA CTt ACT CtA ATC tCG GtT GtG TCC tAG                                                                                                                                                                                                                                                           |

|          |                                                                                                                                                                        |
|----------|------------------------------------------------------------------------------------------------------------------------------------------------------------------------|
|          | TTG GgC TTA TTC AAG AGA TAA GTC CAA CTG GGA CGC AGC<br>CGG GAT TGG AGT GAG TTT GAG CTT GGT CTT TTT-3'                                                                  |
| mh20-HCV | 5'-GTC TtG TAG Att GTG tAT tAT AGA ATT ACA TCA AGG GAG ATT<br>GAT GCA CGG TCT ACG AGA CTT TTT-3'                                                                       |
| mh50-p53 | 5'-CAT tAC AtT GGA gGA tTC CAG TGG TgA TCT AtT GGG gCG GAg<br>tAG CTT TGG TGT GCT GTC CCA AAG CTG TTC CGT CCC AGT AGA<br>TTA CCA CTG GAG TCT TCC AGT GTG ATG TTT TT-3' |
| mh50-HCV | 5'-GAG TGt tCt GGG AGG TtT CGT AGA tCG TGt ATC gTG AGt ACA<br>AgT tCT AAG TGT GCT GTC CTT AGG ATT TGT GCT CAT GAT GCA<br>CGG TCT ACG AGA CCT CCC GGG GCA CTC TTT TT-3' |

**Supplementary Table 2.** The sequence of RNA oligonucleotides. Mutations within the sense strand are indicated in lower cases.

|                                        |                                                                                    |
|----------------------------------------|------------------------------------------------------------------------------------|
| mutated sense strand<br>of 50-bp dsRNA | 5'-GGG GCC UUu AGG AUU AuA AGg UUC AAA GUG uGC<br>UGu UGG UGu CAA CuC UAU UCU U-3' |
| antisense strand<br>of 50-bp dsRNA     | 5'-GGG GAG AAU AGG GUU GGC ACC AGC AGC GCA CUU<br>UGA AUC UUG UAA UCC UGA AGG C-3' |
